# Supplementary material for: Risk of Mortality among Patients with Gastrointestinal Bleeding with Early and Late Treatment with Tranexamic Acid: A Population-Based Cohort Study
Source: MDPI journal article supplement (doi:10.3390/jcm11061741), 2022-03-21
Supplement: s1 [file s1]

**Supplementary Table S1:** Definition of study diseases related to ICD-9-CM and ICD-10-CM.

| Disease                    | ICD-9-CM                                                                                                                                | ICD-10-CM                                                                                                                               |
|----------------------------|-----------------------------------------------------------------------------------------------------------------------------------------|-----------------------------------------------------------------------------------------------------------------------------------------|
| Gastrointestinal bleeding  | 530.1, 530.2, 530.7, 531.0, 531.4, 531.9, 532.0, 532.4, 532.9, 578                                                                      | K20.0, K20.8, K20.9, K21.0, K22.10, K22.11, K22.6, K25.0, K25.4, K25.9, K26.0, K26.4, K26.9, K92.0, K92.1, K92.2                        |
| Hypertension               | 401.x-405.x                                                                                                                             | I10, I11.x, I13.x, I15.x, I16.x, I87.3x, I97.3x, O10.x, O11.x, O13.x, O16.x                                                             |
| Diabetes mellitus          | 250.x, 277.7                                                                                                                            | O24.4, E11.x, E13.x, E88.81                                                                                                             |
| Hyperlipidemia             | 272.0, 272.1, 272.2, 272.4, 272.9                                                                                                       | E78.0x, E78.1, E78.2, E78.3, E78.4x, E78.5, E78.70, E78.79, E78.89, E78.9                                                               |
| Kidney disease             | 403.x, 404.x, 582.x, 583.0–583.7, 585.x, 586.x, 588.x, V42.0, V45.1, V56.x                                                              | E08.2x, E09.2x, E11.2x, E13.2x, I12.x, I13.1, N03.x, N04.x, N11.x, N18.x, O10.2x, O10.3x, Z49.31, I95.3, T82.43XA, E85.3, R88.0, T82.4x |
| Chronic pulmonary diseases | 416.8, 416.9, 490.x–505.x, 506.4, 508.1, 508.8                                                                                          | J41.x, J42, J43.x, J44.x, J47.x                                                                                                         |
| Liver disease              | 070.22, 070.23, 070.32, 070.33, 070.44, 070.54, 070.6, 070.9, 456.0–456.2, 570.x, 571.x, 572.2–572.8, 573.3, 573.4, 573.8, 573.9, V42.7 | K72.x-K77, T86.43, T86.49, Z94.4                                                                                                        |
| Ischemic heart diseases    | 410.x, 412.x, 414.0, 414.0x, 414.2, 414.3, 414.4, 414.8, 414.9                                                                          | I20.x-I25.x                                                                                                                             |
| Ischemic stroke            | 433-435                                                                                                                                 | I63, I65, I66, I67.84, G45, G46                                                                                                         |
| Hemorrhagic stroke         | 430-432,                                                                                                                                | I60, I61, I62                                                                                                                           |
| Atrial fibrillation        | 427.3                                                                                                                                   | I48                                                                                                                                     |

|                             |                                                                                                    |                                                |
|-----------------------------|----------------------------------------------------------------------------------------------------|------------------------------------------------|
| Congestive heart failure    | 398.91, 402.01, 402.11, 402.91, 404.01, 404.03, 404.11, 404.13, 404.91, 404.93, 425.4–425.9, 428.x | I50.2x, I50.3x, I50.4x, I50.84, I50.89, I50.9  |
| Dementia                    | 290.x, 294.1, 331.2                                                                                | F01.x, F02.x, F03.x, G31.x                     |
| Peripheral vascular disease | 093.0, 437.3, 440.x, 441.x, 443.1–443.9, 47.1, 557.1, 557.9, V43.4                                 | E75.21, I73.x, I79.8, T82.856, Z95.82x, Z98.62 |
